# Supplementary material for: Perinatal and 2-year neurodevelopmental outcome in late preterm fetal compromise: the TRUFFLE 2 randomised trial protocol
Source: HighWire-hosted journal article supplement (doi:10.1136/bmjopen-2021-055543), 2022-04-01
Supplement: bmjopen-2021-055543supp004_data_supplement.pdf [file bmjopen-2021-055543supp004_data_supplement.pdf]

# Parent Report of Children's Abilities – Revised (PARCA-R Questionnaire)

## Your child's health and development at 2 years

In this form we ask you to answer some questions about your child and your family. This information is used to work out how your child is developing now that she/he is just over two years old. **Please complete all the questions as accurately as possible.**

If you need any help completing the questionnaire, or have any queries about the questions, please do not hesitate to ask the doctor about these at your appointment.

### Permissions:

The PARCA questionnaire was adapted for use with infants born preterm (Johnson et al., Dev Med Child Neurol 2004, 46;389-397) with permission from Saudino, Dale, Oliver, Petrill, Richardson, Rutter, Simonoff, Stevenson & Plomin (1998). The language measures included in this questionnaire are used with permission from the MacArthur-Bates CDI Advisory Board, Chair: Larry Fenson (2016).

For further information about the English version of the PARCA-R questionnaire, please **email:**  
**parca-r@leicester.ac.uk**

## Your child's play

**As a parent, you will have a good idea of what your child can and can't do. Listed below are a number of activities. Please indicate whether or not your child can do the activity. That is, if you have seen your child do the activity (or something similar) then tick the box under "YES". If you know that your child would not be able to do it, then tick the box under "NO". If you are not sure whether or not your child can do it, then tick the box under "DON'T KNOW". Please answer every question.**

Please keep in mind that these questions are for children ranging from 18 months to 4 years. Some activities may be easy for your child, others may be difficult. Most children of your child's age will not be able to do some of the activities.

|                                                                                                                                                                                              | YES                      | NO                       | DON'T<br>KNOW            |
|----------------------------------------------------------------------------------------------------------------------------------------------------------------------------------------------|--------------------------|--------------------------|--------------------------|
| 1 <b>Does your child copy things you do such as cuddling a teddy?</b> (Try it out if not sure by cuddling a teddy and then giving it to your child. Say: Now you cuddle teddy)               | <input type="checkbox"/> | <input type="checkbox"/> | <input type="checkbox"/> |
| 2 <b>When you hide a toy in full view of your child, will s/he look for it and find it?</b> (Try this out by covering a small toy with a cloth or a cup and seeing if s/he uncovers the toy) | <input type="checkbox"/> | <input type="checkbox"/> | <input type="checkbox"/> |
| 3 <b>Can your child put a simple piece, such as a square or an animal, into the correct place in a puzzle board?</b>                                                                         | <input type="checkbox"/> | <input type="checkbox"/> | <input type="checkbox"/> |
| 4 <b>Some toys have several holes or openings with different shapes, such as a circle, triangle, and star. Could your child put the shapes into the right openings?</b>                      | <input type="checkbox"/> | <input type="checkbox"/> | <input type="checkbox"/> |
| 5 <b>Can your child stack two small blocks or toys on top of each other?</b>                                                                                                                 | <input type="checkbox"/> | <input type="checkbox"/> | <input type="checkbox"/> |
| 6 <b>Can your child put together, by him/herself, a puzzle or something similar where the pieces fit together?</b>                                                                           | <input type="checkbox"/> | <input type="checkbox"/> | <input type="checkbox"/> |
| 7 <b>If so, can s/he do this for a puzzle with ten or more pieces?</b>                                                                                                                       | <input type="checkbox"/> | <input type="checkbox"/> | <input type="checkbox"/> |
| 8 <b>Can your child mark on a piece of paper using the tip of a crayon, pencil, or chalk?</b>                                                                                                | <input type="checkbox"/> | <input type="checkbox"/> | <input type="checkbox"/> |
| 9 <b>Can your child draw a more or less straight line on paper?</b>                                                                                                                          | <input type="checkbox"/> | <input type="checkbox"/> | <input type="checkbox"/> |
| 10 <b>Does your child turn, or try to turn, pages of a book one at a time?</b>                                                                                                               | <input type="checkbox"/> | <input type="checkbox"/> | <input type="checkbox"/> |
| 11 <b>Does your child ever pretend that one object, such as a block, is another object, such as a car or a telephone?</b>                                                                    | <input type="checkbox"/> | <input type="checkbox"/> | <input type="checkbox"/> |

For further information about the English version of the PARCA-R questionnaire, please **email:**

**parca-r@leicester.ac.uk**

|    |                                                                                                                                         | YES                      | NO                       | DON'T KNOW               |
|----|-----------------------------------------------------------------------------------------------------------------------------------------|--------------------------|--------------------------|--------------------------|
| 12 | Can your child stack three small blocks or toys on top of each other by him/herself?                                                    | <input type="checkbox"/> | <input type="checkbox"/> | <input type="checkbox"/> |
| 13 | Does your child ever pretend to do things? For example, riding a horse or making a cup of tea?                                          | <input type="checkbox"/> | <input type="checkbox"/> | <input type="checkbox"/> |
| 14 | Can your child push a car along the floor with the wheels on the floor?                                                                 | <input type="checkbox"/> | <input type="checkbox"/> | <input type="checkbox"/> |
| 15 | Does your child look with interest at pictures in a book?                                                                               | <input type="checkbox"/> | <input type="checkbox"/> | <input type="checkbox"/> |
| 16 | Does your child point to pictures in a book?                                                                                            | <input type="checkbox"/> | <input type="checkbox"/> | <input type="checkbox"/> |
| 17 | Does your child try to copy things you do, such as stirring with a spoon in a cup?                                                      | <input type="checkbox"/> | <input type="checkbox"/> | <input type="checkbox"/> |
| 18 | Can your child stack seven small blocks or toys on top of each other by him/herself?                                                    | <input type="checkbox"/> | <input type="checkbox"/> | <input type="checkbox"/> |
| 19 | Does your child point or show where people or objects are when you ask: "Where is the light?" "Where is Daddy?" or "Where is Teddy?"    | <input type="checkbox"/> | <input type="checkbox"/> | <input type="checkbox"/> |
| 20 | Does your child ever pretend that two dolls are playing together, or are talking to each other, or one is feeding the other?            | <input type="checkbox"/> | <input type="checkbox"/> | <input type="checkbox"/> |
| 21 | Does your child ever play pretend games with another child, pretending to be someone else, such as a mummy, daddy, policeman, or nurse? | <input type="checkbox"/> | <input type="checkbox"/> | <input type="checkbox"/> |
| 22 | Does your child ever play any game with another child that involves taking turns?                                                       | <input type="checkbox"/> | <input type="checkbox"/> | <input type="checkbox"/> |
| 23 | Does your child ever copy some action shortly (within a few minutes) after s/he has seen it?                                            | <input type="checkbox"/> | <input type="checkbox"/> | <input type="checkbox"/> |
| 24 | Can your child fetch something, such as a toy, from another room by him/herself when you ask?                                           | <input type="checkbox"/> | <input type="checkbox"/> | <input type="checkbox"/> |
| 25 | Does your child know where some things belong, such as, that his/her toys belong in a box?                                              | <input type="checkbox"/> | <input type="checkbox"/> | <input type="checkbox"/> |
| 26 | Does your child ever save or put to one side a biscuit (or snack) for later, on his/her own?                                            | <input type="checkbox"/> | <input type="checkbox"/> | <input type="checkbox"/> |
| 27 | Have you ever seen your child get together three or more toys before beginning to play with them?                                       | <input type="checkbox"/> | <input type="checkbox"/> | <input type="checkbox"/> |
| 28 | Have you ever seen your child sort things (blocks, other toys) into groups or piles that go together on his/her own?                    | <input type="checkbox"/> | <input type="checkbox"/> | <input type="checkbox"/> |

For further information about the English version of the PARCA-R questionnaire, please **email:**

**parca-r@leicester.ac.uk**

|                                                                                                                 | YES                      | NO                       | DON'T<br>KNOW            |
|-----------------------------------------------------------------------------------------------------------------|--------------------------|--------------------------|--------------------------|
| 29 <b>If your child wants something out of reach, does s/he go and find a chair or box to stand on?</b>         | <input type="checkbox"/> | <input type="checkbox"/> | <input type="checkbox"/> |
| 30 <b>When your child uses or plays with a telephone, does s/he speak into the mouthpiece not the earpiece?</b> | <input type="checkbox"/> | <input type="checkbox"/> | <input type="checkbox"/> |
| 31 <b>When your child drinks from a cup, is s/he careful about putting it down, trying not to spill it?</b>     | <input type="checkbox"/> | <input type="checkbox"/> | <input type="checkbox"/> |
| 32 <b>Does your child try to turn doorknobs, twist tops, or screw lids on or off jars?</b>                      | <input type="checkbox"/> | <input type="checkbox"/> | <input type="checkbox"/> |
| 33 <b>Does your child recognise him/her self when looking in the mirror?</b>                                    | <input type="checkbox"/> | <input type="checkbox"/> | <input type="checkbox"/> |
| 34 <b>Does your child ever use his/her index (first) finger to point to show an interest in something?</b>      | <input type="checkbox"/> | <input type="checkbox"/> | <input type="checkbox"/> |

For further information about the English version of the PARCA-R questionnaire, please **email:**

**parca-r@leicester.ac.uk**

## What your child can say

**1. Children understand many more words than they can say. Here, we are only interested in the words your child SAYS. Please tick all the words you have heard your child say. If your child uses a different pronunciation of a word – e.g., “tend” for pretend, or “duce” for juice – tick it anyway. Please keep in mind that this is only a sample of words; your child may know many other words not on this list.**

|                                        |                                        |                                      |                                     |                                  |
|----------------------------------------|----------------------------------------|--------------------------------------|-------------------------------------|----------------------------------|
| <input type="checkbox"/> Baa baa       | <input type="checkbox"/> Cream cracker | <input type="checkbox"/> Bed         | <input type="checkbox"/> Carry      | <input type="checkbox"/> Last    |
| <input type="checkbox"/> Meow          | <input type="checkbox"/> Juice         | <input type="checkbox"/> Bedroom     | <input type="checkbox"/> Chase      | <input type="checkbox"/> Tiny    |
| <input type="checkbox"/> Ouch/ow       | <input type="checkbox"/> Meat          | <input type="checkbox"/> Settee/sofa | <input type="checkbox"/> Pour       | <input type="checkbox"/> Wet     |
| <input type="checkbox"/> Uh-oh/oh dear | <input type="checkbox"/> Milk          | <input type="checkbox"/> Oven/cooker | <input type="checkbox"/> Finish     | <input type="checkbox"/> After   |
| <input type="checkbox"/> Woof woof     | <input type="checkbox"/> Peas          | <input type="checkbox"/> Stairs      | <input type="checkbox"/> Fit        | <input type="checkbox"/> Day     |
| <input type="checkbox"/> Bear          | <input type="checkbox"/> Hat           | <input type="checkbox"/> Flag        | <input type="checkbox"/> Hug/cuddle | <input type="checkbox"/> Tonight |
| <input type="checkbox"/> Bird          | <input type="checkbox"/> Necklace      | <input type="checkbox"/> Rain        | <input type="checkbox"/> Listen     | <input type="checkbox"/> Our     |
| <input type="checkbox"/> Cat           | <input type="checkbox"/> Shoe          | <input type="checkbox"/> Star        | <input type="checkbox"/> Like       | <input type="checkbox"/> Them    |
| <input type="checkbox"/> Dog           | <input type="checkbox"/> Sock          | <input type="checkbox"/> Swing       | <input type="checkbox"/> Pretend    | <input type="checkbox"/> This    |
| <input type="checkbox"/> Duck          | <input type="checkbox"/> Chin          | <input type="checkbox"/> School      | <input type="checkbox"/> Rip/tear   | <input type="checkbox"/> Us      |
| <input type="checkbox"/> Horse         | <input type="checkbox"/> Ear           | <input type="checkbox"/> Sky         | <input type="checkbox"/> Shake      | <input type="checkbox"/> Where   |
| <input type="checkbox"/> Aeroplane     | <input type="checkbox"/> Hand          | <input type="checkbox"/> Zoo         | <input type="checkbox"/> Taste      | <input type="checkbox"/> Beside  |
| <input type="checkbox"/> Boat          | <input type="checkbox"/> Leg           | <input type="checkbox"/> Friend      | <input type="checkbox"/> Gentle     | <input type="checkbox"/> Down    |
| <input type="checkbox"/> Car           | <input type="checkbox"/> Pillow        | <input type="checkbox"/> Mummy/mum   | <input type="checkbox"/> Think      | <input type="checkbox"/> Under   |
| <input type="checkbox"/> Ball          | <input type="checkbox"/> Comb          | <input type="checkbox"/> Person      | <input type="checkbox"/> Wish       | <input type="checkbox"/> All     |
| <input type="checkbox"/> Book          | <input type="checkbox"/> Lamp/torch    | <input type="checkbox"/> Bye/byebye  | <input type="checkbox"/> All gone   | <input type="checkbox"/> Much    |
| <input type="checkbox"/> Game          | <input type="checkbox"/> Plate         | <input type="checkbox"/> Hi/hello    | <input type="checkbox"/> Cold       | <input type="checkbox"/> Could   |
| <input type="checkbox"/> Sandwich      | <input type="checkbox"/> Rubbish       | <input type="checkbox"/> No          | <input type="checkbox"/> Fast       | <input type="checkbox"/> Need to |
| <input type="checkbox"/> Fish          | <input type="checkbox"/> Tray          | <input type="checkbox"/> Shopping    | <input type="checkbox"/> Happy      | <input type="checkbox"/> Would   |
| <input type="checkbox"/> Sauce         | <input type="checkbox"/> Towel         | <input type="checkbox"/> Thank you   | <input type="checkbox"/> Hot        | <input type="checkbox"/> If      |

For further information about the English version of the PARCA-R questionnaire, please **email:**

**parca-r@leicester.ac.uk**

## How your child uses words

**2. We would like to know how your child uses the words s/he can say. Please tick one box for each question below to tell us whether your child uses words like this often, sometimes, or not yet.**

Please keep in mind that these questions are for children up to 4 years of age. Many children of your child's age will not be able say some of the words or sentences below.

|           |                                                                                                                                                                                                           | OFTEN                    | SOMETIMES                | NOT<br>YET               |
|-----------|-----------------------------------------------------------------------------------------------------------------------------------------------------------------------------------------------------------|--------------------------|--------------------------|--------------------------|
| <b>A1</b> | Does your child ever talk about past events or people who are not present? For example, a child who saw a carnival last week might later say 'carnival', 'clown', or 'band'.                              | <input type="checkbox"/> | <input type="checkbox"/> | <input type="checkbox"/> |
| <b>A2</b> | Does your child ever talk about something that is going to happen in the future? E.g. saying 'choo-choo' or 'bus' before you leave the house on a trip, or saying 'swing' when you are going to the park? | <input type="checkbox"/> | <input type="checkbox"/> | <input type="checkbox"/> |
| <b>A3</b> | Does your child ever talk about objects that are not present? For example, asking about a missing toy not in the room, or asking about someone not present?                                               | <input type="checkbox"/> | <input type="checkbox"/> | <input type="checkbox"/> |
| <b>A4</b> | Does your child understand if you ask for something that is not in the room? For example, would s/he go to the bedroom to get a teddy bear when you say 'Where's the bear?'                               | <input type="checkbox"/> | <input type="checkbox"/> | <input type="checkbox"/> |
| <b>A5</b> | Does your child know who things belong to? For example, a child might point to mummy's shoe and say 'Mummy'.                                                                                              | <input type="checkbox"/> | <input type="checkbox"/> | <input type="checkbox"/> |
| <b>A6</b> | Has your child started to put together words yet, such as 'Daddy gone' or 'Doggie bite'?                                                                                                                  | <input type="checkbox"/> | <input type="checkbox"/> | <input type="checkbox"/> |

**If you answered "Sometimes" or "Often" to question A6, please answer all the questions on the next page.**

For further information about the English version of the PARCA-R questionnaire, please **email**:

**parca-r@leicester.ac.uk**

**3. For EACH PAIR of sentences below – A and B – please tick the one that sounds MOST like the way your child talks at the moment, even if s/he would not say that EXACT sentence. If your child is saying sentences even more complicated than the two examples provided, tick B.**

| Talking about something happening right now              |  | Talking about something that already happened     |                                               |
|----------------------------------------------------------|--|---------------------------------------------------|-----------------------------------------------|
| <b>A7</b>                                                |  | <b>A8</b>                                         |                                               |
| A <input type="checkbox"/> I make tower                  |  | A <input type="checkbox"/> Daddy pick me up       | <b>A9</b>                                     |
| B <input type="checkbox"/> I making tower                |  | B <input type="checkbox"/> Daddy picked me up     | A <input type="checkbox"/> That my truck      |
|                                                          |  |                                                   | B <input type="checkbox"/> That's my truck    |
| <b>A10</b>                                               |  | <b>A11</b>                                        | <b>A12</b>                                    |
| A <input type="checkbox"/> Baby crying                   |  | A <input type="checkbox"/> There a doggie         | A <input type="checkbox"/> Coffee hot         |
| B <input type="checkbox"/> Baby is crying                |  | B <input type="checkbox"/> There's a doggie       | B <input type="checkbox"/> That coffee hot    |
| <b>A13</b>                                               |  | <b>A14</b>                                        | <b>A15</b>                                    |
| A <input type="checkbox"/> I no do it                    |  | A <input type="checkbox"/> I like read stories    | A <input type="checkbox"/> Biscuit mummy      |
| B <input type="checkbox"/> I can't do it                 |  | B <input type="checkbox"/> I like to read stories | B <input type="checkbox"/> Biscuit for mummy  |
| <b>A16</b>                                               |  | <b>A17</b>                                        | <b>A18</b>                                    |
| A <input type="checkbox"/> Don't read book               |  | A <input type="checkbox"/> Baby want eat          | A <input type="checkbox"/> Look at me         |
| B <input type="checkbox"/> Don't want you read that book |  | B <input type="checkbox"/> Baby want to eat       | B <input type="checkbox"/> Look at me dancing |

**Thank you very much for your time**

For further information about the English version of the PARCA-R questionnaire, please **email:**

**parca-r@leicester.ac.uk**
