# Supplementary figures and images for: Perinatal and 2-year neurodevelopmental outcome in late preterm fetal compromise: the TRUFFLE 2 randomised trial protocol
Source: HighWire-hosted journal article supplement (doi:10.1136/bmjopen-2021-055543), 2022-04-01

## TRUFFLE 2 flowchart

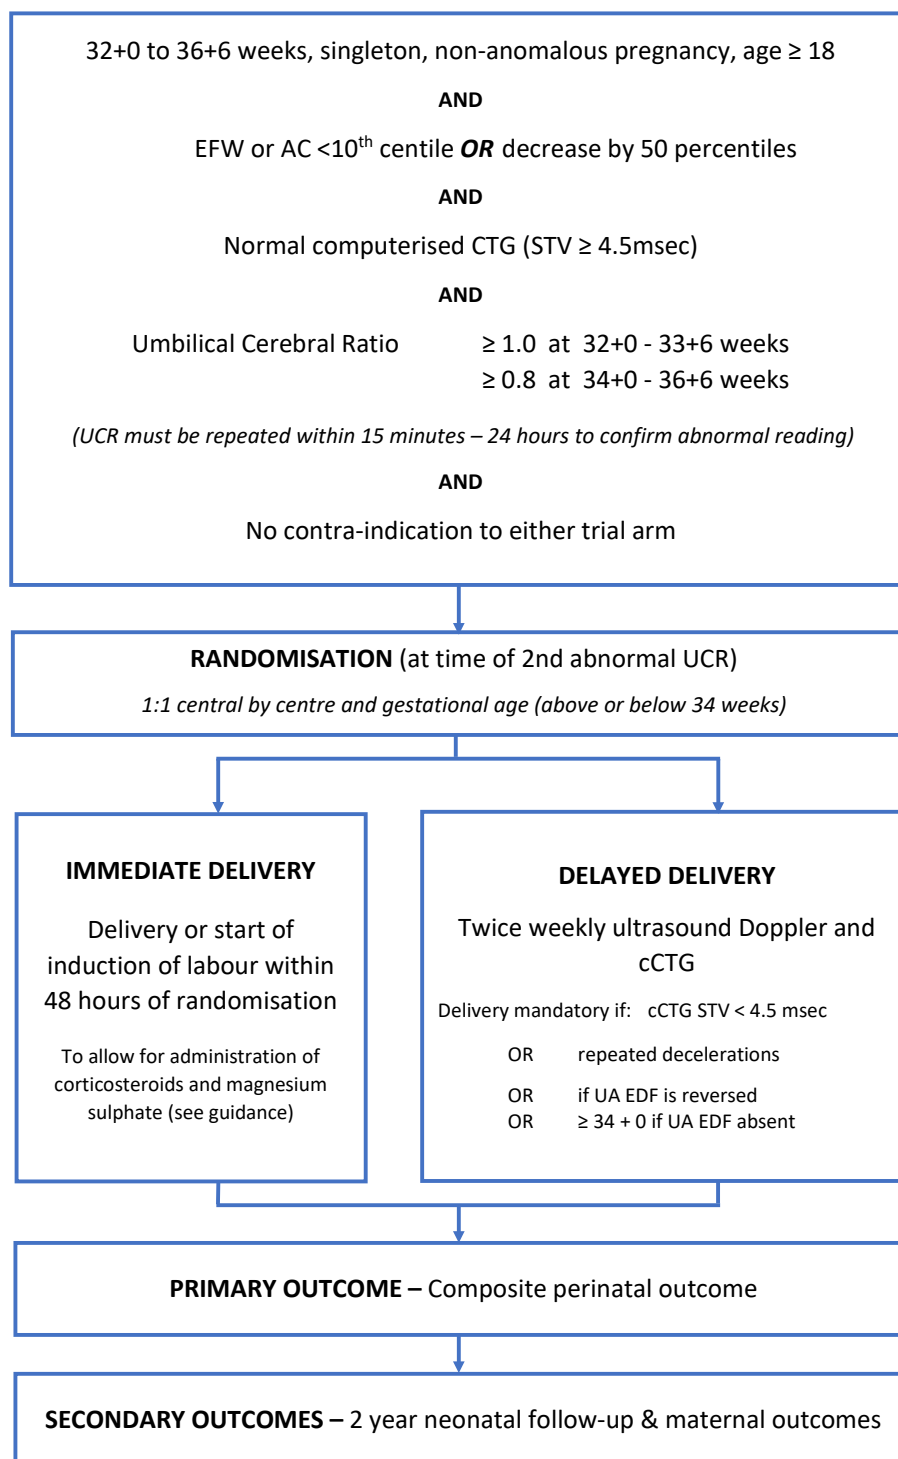

Supplement: bmjopen-2021-055543supp001_data_supplement.pdf [file bmjopen-2021-055543supp001_data_supplement.pdf]
